# Supplementary material for: A metabolic switch regulates the transition between growth and diapause in C. elegans
Source: PubMed Central journal article supplement (PMC7081555; doi:10.1186/s12915-020-0760-3), 2020-03-18
Supplement: 12915_2020_760_MOESM3_ESM.pdf [file 12915_2020_760_MOESM3_ESM.pdf]

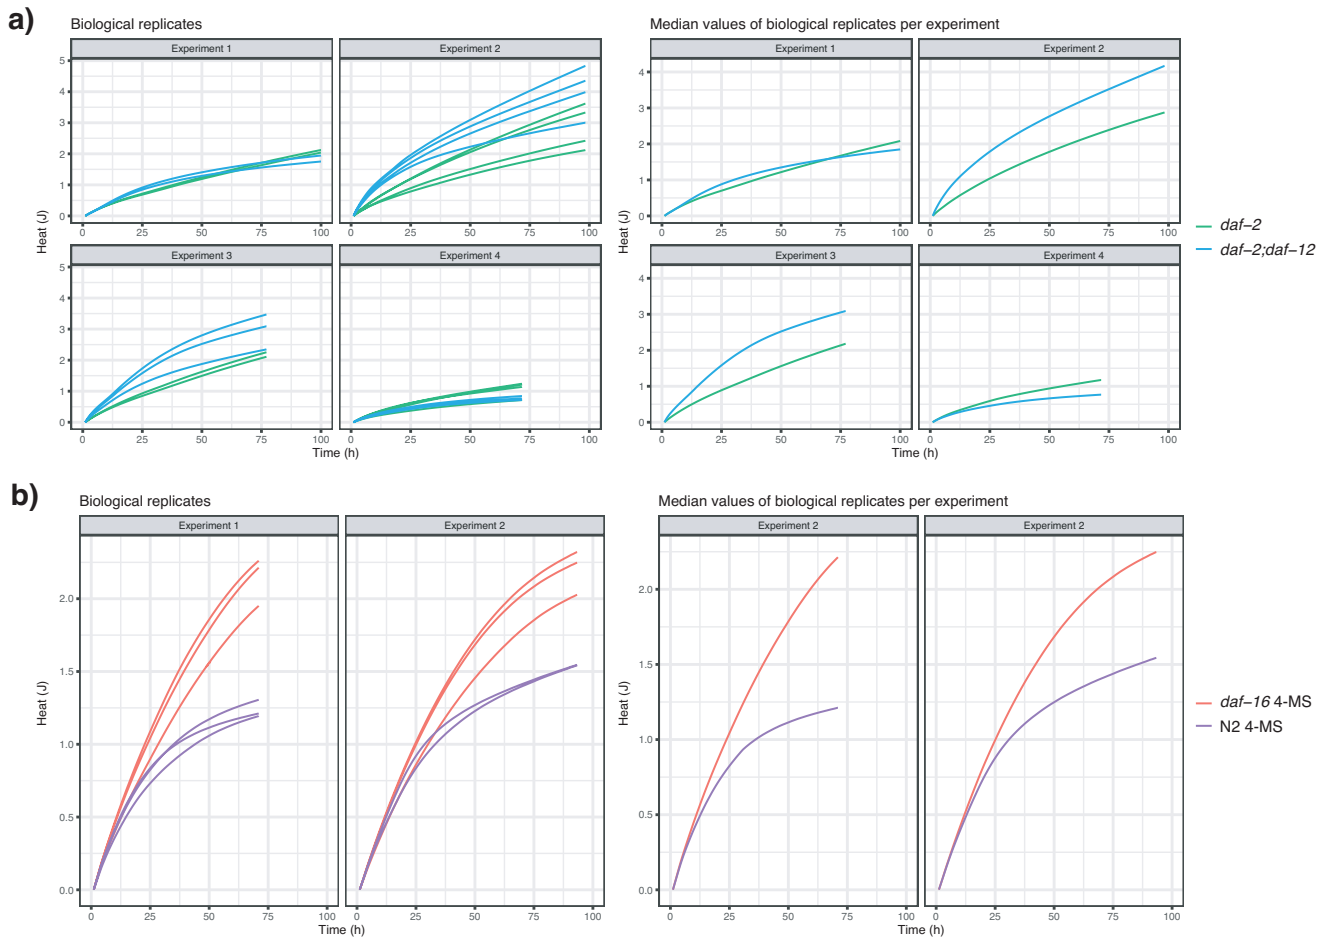

Figure S3  
Penkov et al.
